# Supplementary material for: Effective Formation of Well-Defined Polymeric Microfibers and Nanofibers with Exceptional Uniformity by Simple Mechanical Needle Spinning
Source: MDPI journal article supplement (doi:10.3390/polym10090980), 2018-09-03
Supplement: s1 [file s1]

# Effective Formation of Well-Defined Polymeric Microfibers and Nanofibers with Exceptional Uniformity by Simple Mechanical Needle Spinning

Hoik Lee <sup>1</sup>, Yuma Inoue <sup>1</sup>, Myungwoong Kim <sup>2</sup>, Xuehong Ren <sup>3</sup> and Ick Soo Kim <sup>1,\*</sup>

<sup>1</sup> Nano Fusion Technology Research Group, Division of Frontier Fibers, Institute for Fiber Engineering (IFES), Interdisciplinary Cluster for Cutting Edge Research (ICCER), Shinshu University, Nagano 386-8567, Japan; hoik0822@gmail.com (H.L.); 18fs304h@shinshu-u.ac.jp (Y.I.)

<sup>2</sup> Department of Chemistry and Chemical Engineering, Inha University, Incheon 22212, Korea; mkim233@inha.ac.kr

<sup>3</sup> Key Laboratory of Eco-textiles of Ministry of Education, College of Textiles and Clothing, Jiangnan University, Wuxi 214122, China; xuehongr@hotmail.com

\* Correspondence: kimicksoo.gr@gmail.com; Tel.: +81-268-21-5439; Fax: +81-268-21-5482

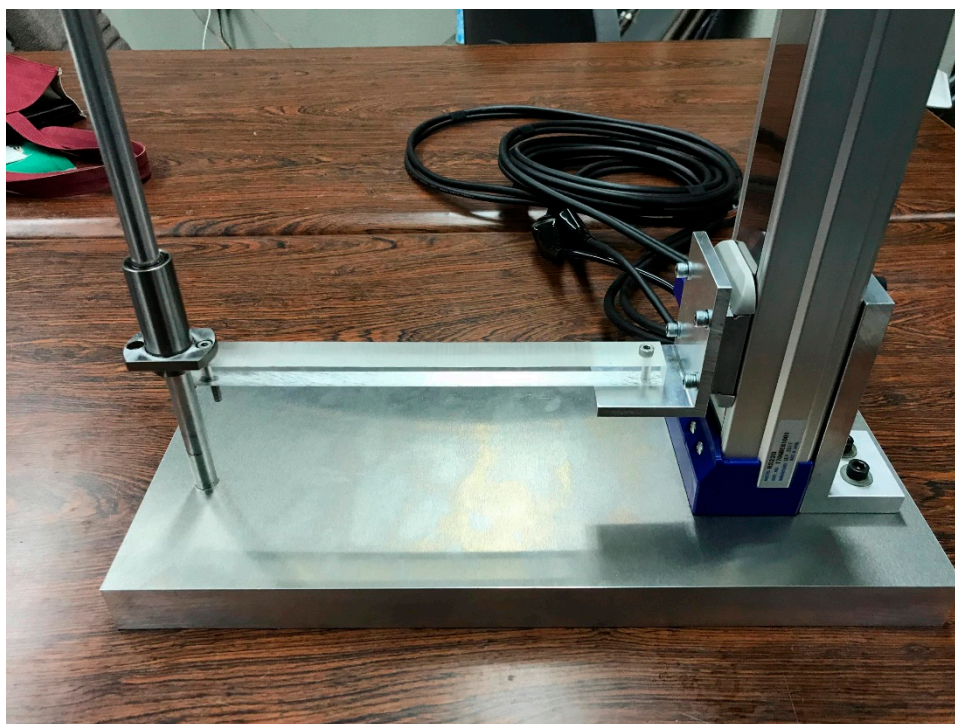

**Figure S1.** A photograph of the experimental setup for needlespinning.
